# Supplementary material for: Sequence capture phylogenomics of eyeless Cicurina spiders from Texas caves, with emphasis on US federally-endangered species from Bexar County (Araneae, Hahniidae)
Source: Zookeys. 2018 Jun 26;(769):49–76. doi: 10.3897/zookeys.769.25814 (PMC6030207; doi:10.3897/zookeys.769.25814)
Supplement: Supplementary material 6 — Table S2. Troglomorphy Index data [file zookeys-769-049-s006.xlsx]

## Sheet: Sheet1
Species	Location	Collection Date	Voucher #	Lifestage	Clade	Cephalothorax (2.5X)	Femur I (2.5X)	Patella+tibia I (2.5X)	LI	TI	Notes
C. bullis	Isocow Cave (known location)	15 Dec, 1993	TMM 9293	imm	R	38	34	40	74	1.94737
C. bullis	Eaglesnest Cave	1 Nov, 2001	TMM 34,452	F paratype	R	46	41	50	91	1.97826
C. bullis	Root Canal Cave	20 April, 1999	TMM 34,454	F paratype	R	51	44	54	98	1.92157
C. bullis	Root Canal Cave	20 April, 1999; molted to mat 2 Sept 2000	TMM 34,456	F paratype (right leg)	R	50	40	50	90	1.8	in UCE set
C. bullis	Root Canal Cave	26 Oct, 1995	TMM 9611	imm	R	33	27	31	58	1.75758
C. bullis	Hilger Hole	20 April, 1999	TMM 34,453	F paratype	R	64	55	66	121	1.89062
C. bullis	Platypus Pit	30 March, 1995	TMM 35, 354	F paratype	R	50	45	52	97	1.94
C. brunsi	Accident Sink	12 April, 2005	TMM 45, 916	F paratype	R	48	42	50	92	1.91667
C. reclusa	Kappelman Salamander Cave	14 Jan, 1965	TMM 10,149	pM	R	38	32	34	66	1.73684
C. neovespera	Elm Springs Cave	no date	TMM 32,994	imm	R	36	29	35	64	1.77778
C. neovespera	Grubbs Cave, No. 23, 5 mi. NE Helotes	2 Oct, 19995	TMM 11,795	imm	R	40	35	39	74	1.85
C. neovespera	Grubbs Cave, No. 23, 5 mi. NE Helotes	2 Oct, 19995	TMM 11,795	imm	R	48	43	50	93	1.9375
C. baronia	Robber Baron Cave	22 May, 1993	TMM 9405	imm	R	45	40	46	86	1.91111
C. baronia	Robber Baron Cave	22 May, 1993	TMM 9405	imm	R	55	45	54	99	1.8
C. loftini	Caracol Creek Coon Cave	15 June, 1993	TMM 34,445	imm	R	45	39	45	84	1.86667
C. loftini	Caracol Creek Coon Cave	15 June, 1993	TMM 34,445	F	R	51	43	53	96	1.88235
blind Cicurina	SAWS Pump Station karst feature S-29	16 May, 2014	TMM 90,714	imm	R	32	25	29	54	1.6875	small spider
blind Cicurina	SAWS Pump Station karst feature S-29	16 May, 2014	TMM 90,714	imm	R	33	24	29	53	1.60606	small spider
C. loftini	SBC cave	20 Feb, 2003	TMM 35, 352	F paratype (right leg)	R	62	55	68	123	1.98387	in UCE set
C. loftini	AMA-005	27 March, 2017	Zara 9593	F (right leg)	R	61	53	68	121	1.98361
C. loftini	AMA-006	12 May, 2017	Zara 9721	F (right leg)	R	64	51	64	115	1.79688
C. loftini	AMA-002	24 March, 2017	Zara 9589	F	R	58	51	60	111	1.91379
C. loftini	AMA-002	24 March, 2017	Zara 9590	F	R	64	56	64	120	1.875
blind Cicurina	Gov Canyon Bat Cave	24 May, 1993	TMM 9392	imm	ME	37	38	43	81	2.18919
blind Cicurina	Gov Canyon Bat Cave	24 May, 1998	TMM 11,778	imm	ME	37	36	41	77	2.08108
C. madla (known site)	Madlas Cave	24 May, 1993	TMM 9394	imm	ME	37	37	44	81	2.18919
C. madla (known site)	Madlas Cave	24 May, 1993	TMM 9394	imm (right leg)	ME	32	30	37	67	2.09375
C. madla (known site)	Christmas Cave	6 Sept, 1993	TMM 34,448	F	ME	65	62	75	137	2.10769
C. madla (known site)	Robbers Cave	22 June, 1993	TMM 9403	imm	ME	52	52	62	114	2.19231
C. madla (known site)	Robbers Cave	22 June, 1993	TMM 9403	imm	ME	49	46	56	102	2.08163
C. madla (known site)	Robbers Cave	no date	TMM 33,676	imm (right leg)	ME	22	20	20	40	1.81818	small spider
C. madla (known site)	Hills & Dales Pit	2000-11-01	TMM 29,958	imm	ME	42	40	49	89	2.11905
C. madla (known site)	Hills & Dales Pit	2000-11-01	TMM 29,958	imm	ME	21	18	19	37	1.7619	small spider
C. madla (known site)	Madlas Drop Cave	8 June, 1993	TMM 9390	imm	ME	54	54	64	118	2.18519
C. madla (known site)	Madlas Drop Cave	8 June, 1993	TMM 9390	imm	ME	45	44	53	97	2.15556
C. madla (known site)	Madlas Drop Cave	8 June, 1993	TMM 34,451	F	ME	57	52	66	118	2.07018
C. madla (known site)	Helotes blowhole	20 Nov, 2000	TMM 33,692	imm	ME	47	44	54	98	2.08511
C. madla (known site)	Headquarters Cave	26 Oct, 1995	TMM 29,384	imm	ME	65	61	72	133	2.04615
C. madla (known site)	Headquarters Cave	16 June, 1993	TMM 9385	imm	ME	60	56	67	123	2.05
C. madla (known site)	Headquarters Cave	16 June, 1993	TMM 34,450	F	ME	66	65	80	145	2.19697	in UCE set
	Hilotes Hilltop	29 Nov, 2000	TMM 33,696	pM	ME	45	43	53	96	2.13333
	Lost Pot Cave	4 Feb, 1995	TMM 34,449	F	ME	68	64	78	142	2.08824
	Lost Pot Cave	4 Feb, 1995	TMM 34,449	imm	ME	38	36	42	78	2.05263
C. madla (known site)	Lithic Ridge	12 Sept, 2001	TMM 32,993	pM	ME	51	47	57	104	2.03922
C. madla (known site)	Lithic Ridge	1996-06-04	TMM 9575	imm	ME	50	47	56	103	2.06
C. madla (known site)	Lithic Ridge	7 april, 2017	ZARA 9691	F	ME	54	52	64	116	2.14815
C. cf madla	Bob Clark Cave	23 Sept, 2000	TMM 29,408	imm	ME	48	46	55	101	2.10417
C. cf madla	Bob Clark Cave	23 Sept, 2000	TMM 29,408	imm	ME	41	41	49	90	2.19512
blind Cicurina	Stahl Cave	14 Dec, 2000	TMM 29, 942	imm	??	47	49	61	110	2.34043
	ceph (2.5X)	dorsal view, parallel to lens, anterior to ventral edge @ midline
	femur I (2.5X)	left leg (*unless noted otherwise), retrolateral view, proximal to distal at longest point, removed from body
	patella+tibia I (2.5X)	left leg (*unless noted otherwise),retrolateral view, proximal to distal at longest point, removed from body
	1 mm = 25 units @ 2.5X
	*Did not include specimens collected then raised in captivity
	*All measured using hand sanitizer to stabilize
